# Supplementary material
Source: Springer Nature journal article supplement (https://www.springermedizin.de/resource/supplementary/12916_2013_853_MOESM2_ESM.pdf/9598514)

**Identification**

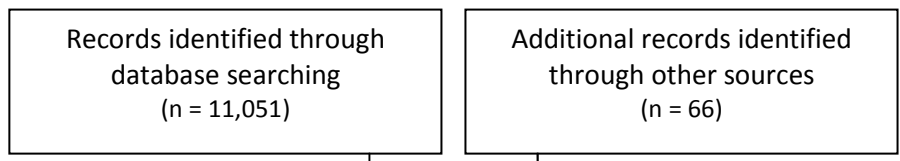

**Screening**

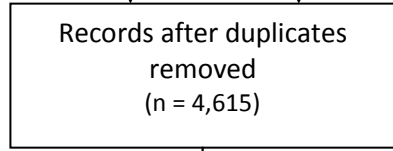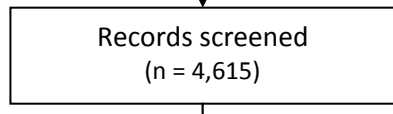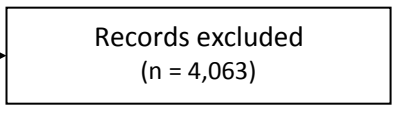

**Eligibility**

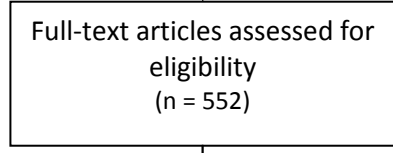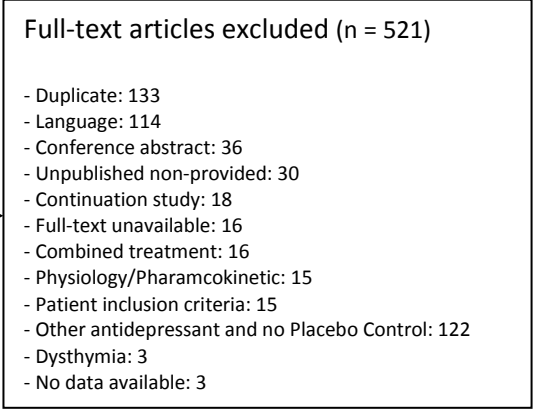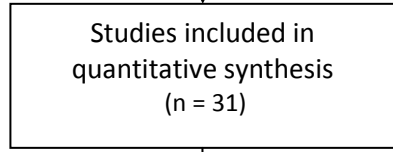

**Inclusion**

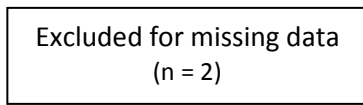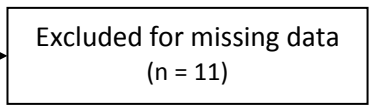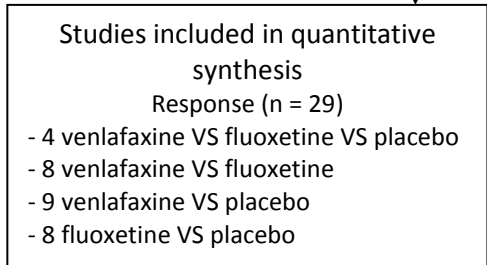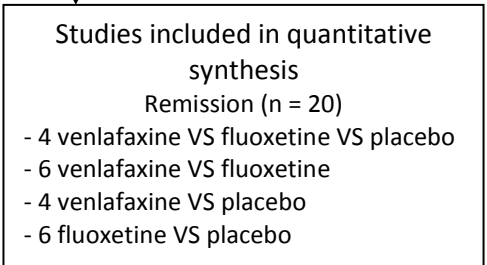

Supplement: MOESM2 [file 9598514]
